# Supplementary material
Source: PubMed Central journal article supplement (PMC3713500)
Supplement: NIHMS436811-supplement-04.pdf [file NIHMS436811-supplement-04.pdf]

## **Supplemental information and figure captions**

### **1. RNA and cDNA yield in samples processed for RT-PCR analysis.**

We assayed our RNA yields/sample over the course of 16 days. They were: Day 1: 740-980ng; Day 3: 720-1100ng; Day 5: 820-940ng; Day 7: 920-1020ng; Day 8: 570-2920ng, and Day 16: 2020-5760ng. As we generally used 7ng of RNA for each RT-PCR reaction, our cDNA yield could allow us to perform 81-822 RT-PCR reactions per RNA preparation.

### **2. Reference factors in statistical analysis.**

In RT-PCR analyses, when we compared the gene expression in chondrocytes in different scaffolds at a specific time point, and under a specific condition (control, IL-1 $\beta$  or TNF $\alpha$ ), one-way ANOVA was used, and the factor was the scaffolding material. In RT-PCR analysis, when we compared gene expression in chondrocytes grown in different scaffolds over different cytokine treatments, we used two-way ANOVA, and the factors were the scaffolding material and treatment. In cytokine release analysis, we used two-way ANOVA as we compared the

release kinetics among the materials over time in each treatment (IL-1 $\beta$  or TNF $\alpha$ ). Thus the factors for this statistical analysis were the scaffolding material and time. In water uptake analysis, we used one-way ANOVA to compare their water uptake ability in three different materials, and the factor was the scaffolding material. In toluidine blue quantification and H&E analyses, we used one-way ANOVA to compare three different materials under one specific treatment (either in control, or IL-1 $\beta$  or TNF $\alpha$  treatment). Thus the factor in this case was the scaffolding material.

**Supplemental figure captions:**

**S1. Cartilage marker Sox9 expression in isolated chondrocytes.** Sox9 expression in freshly isolated chondrocytes was analyzed by immunocytochemistry analysis. Bright field (BF) image (left), fluorescence image (middle), and merged image (right) are shown. Scale bar: 100 $\mu$ m. All cells were positive for Sox9 staining.

**S2. Statistical analysis on cytokine release kinetics of the scaffolds, showing detailed statistical comparisons.** Linear graphs in cytokine release kinetics of different materials in Figure 8 were formatted into bar graphs to show detailed statistical comparisons. **(A)** Percent release of IL-1 $\beta$  from scaffolds at each time point. **(B)** Cumulative release analysis of IL-1 $\beta$  from the scaffolds. **(C)** Percent release of TNF $\alpha$  from scaffolds at each time point. **(D)** Cumulative release analysis of TNF $\alpha$  from scaffolds. Data present mean  $\pm$  SD. Statistical analysis of the data was determined by two-way ANOVA. \* $p$ <0.05.

**S table1. Sequences of gene-specific primers used in the RT-PCR analysis.** Forward (FWD) and reverse (REV) primer sequences and accession numbers for all the PCR primers are listed.
